# Supplementary material for: Phosphorylation of tyrosine 90 in SH3 domain is a new regulatory switch controlling Src kinase
Source: eLife journal article supplement (doi:10.7554/elife.82428), 2023-07-10

Figure 2A

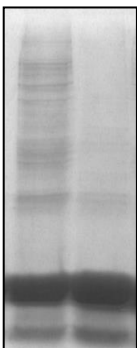

Figure 2B

FAK

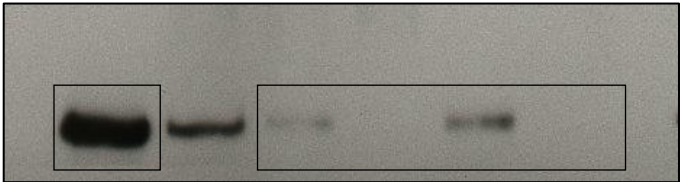

p130Cas

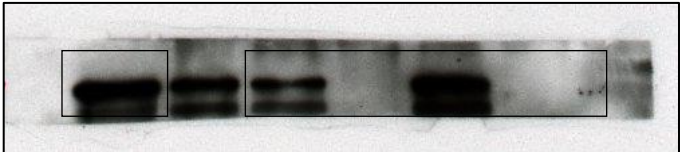

Stat3

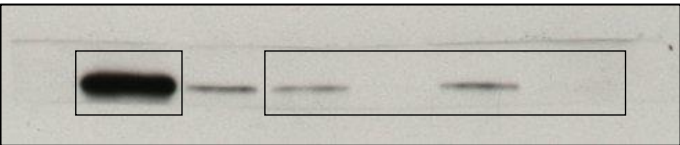

paxillin

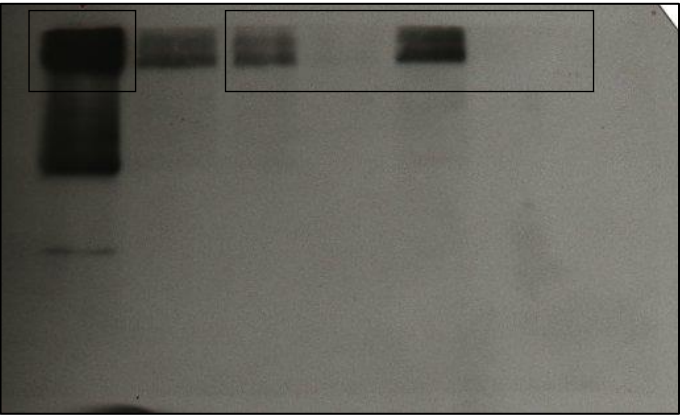

Figure 2C

IP: Src  
IB: FAK

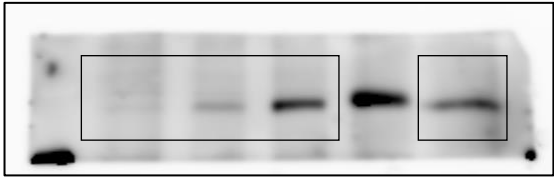

TL  
IB: FAK

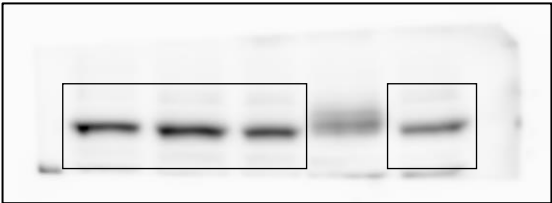

IP: Src  
IB: Cas

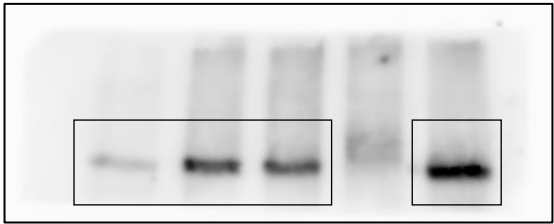

TL  
IB: Cas

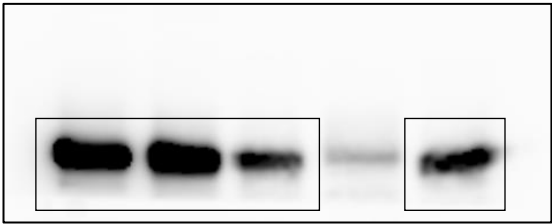

IP: Src  
IB: Stat3

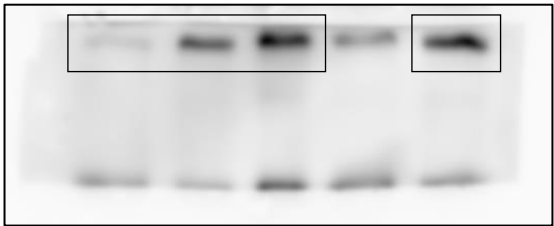

TL  
IB: Stat3

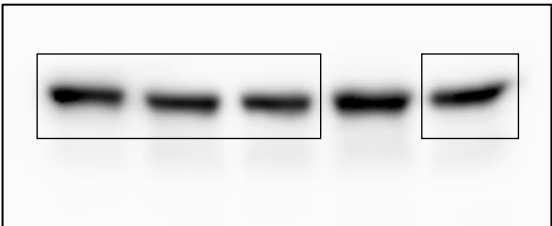

IP: Src  
IB: paxillin

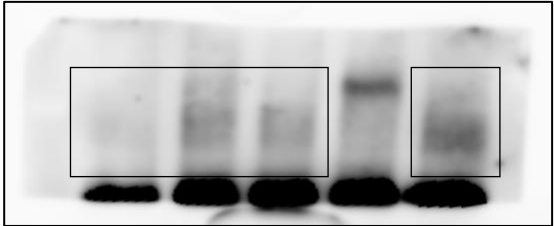

TL  
IB: paxillin

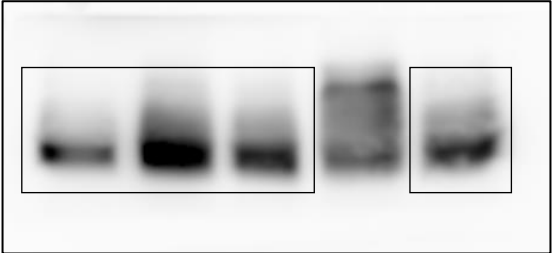

IP: Src  
IB: Src

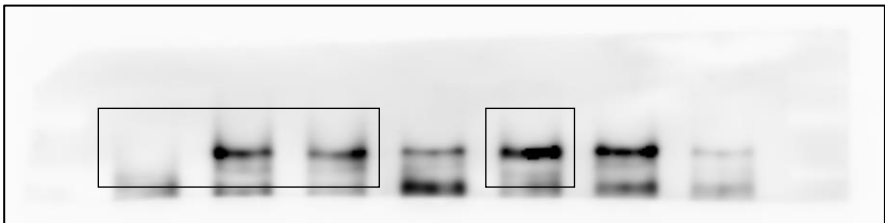

TL  
IB: Src

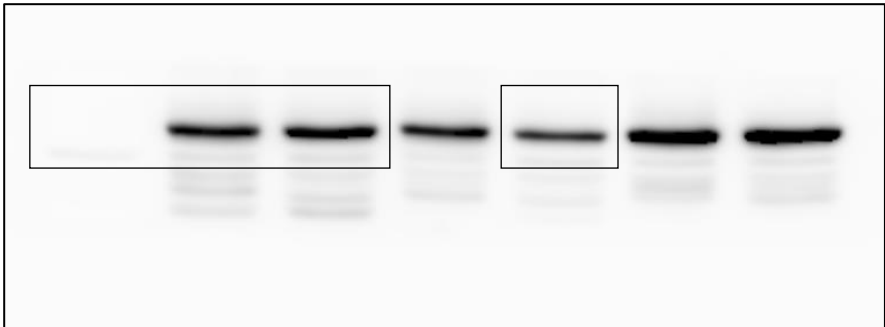

Supplement: supp [file elife-82428-supp-v1.zip]
