# Supplementary material for: Phosphorylation of tyrosine 90 in SH3 domain is a new regulatory switch controlling Src kinase
Source: eLife journal article supplement (doi:10.7554/elife.82428), 2023-07-10
Supplement: supp [file Fig 1B source data.xlsx]

## Sheet: List1
MSCV	Src90E	Src90F	Src527F	c-Src
0	0.83833	0.363618	1.39333	0.408125
0	1.49227	0.45915	2.19942	0.439926
0	0.716098	0.121605	2.09071	0.16452
0	0.749833	0.02019	1.30655	0.204482
