# Supplementary material for: Phosphorylation of tyrosine 90 in SH3 domain is a new regulatory switch controlling Src kinase
Source: eLife journal article supplement (doi:10.7554/elife.82428), 2023-07-10
Supplement: supp [file Fig 1D source data.xlsx]

## Sheet: List1
Src90E	Src90F	Src527F	c-Src
0.007371	0.002848	0.008353	0.003783
0.01111	0.00358	0.011069	0.002988
0.011196	0.00419	0.009104	0.00284
0.009593	0.004754	0.011161	0.007839
0.008861	0.006059	0.012986	0.007719
0.009779	0.007967	0.010742	0.009237
0.009821	0.005691	0.008049	0.006437
