# Supplementary material for: Phosphorylation of tyrosine 90 in SH3 domain is a new regulatory switch controlling Src kinase
Source: eLife journal article supplement (doi:10.7554/elife.82428), 2023-07-10
Supplement: supp [file Fig 2D source data.xlsx]

## Sheet: FAK
FAK
Src90E	Src90F	c-Src
0.3149	0.997529	1.00528
0.187801	0.573602	0.876924
0.176539	0.360089	1.07927
0.235321	1.15516	1.03853

## Sheet: p130Cas
p130Cas
Src90E	Src90F	c-Src
0.5583	0.955037	0.540624
0.602364	0.597914	0.845523
0.359855	0.993184	1.61385

## Sheet: Stat3
Stat3
Src90E	Src90F	c-Src
0.388924	1.31714	0.855345
0.372324	0.655699	0.979619
0.705514	1.20115	1.16504

## Sheet: paxillin
paxillin
Src90E	Src90F	c-Src
0.601259	1.11593	1.22926
0.284596	1.99627	0.600977
0.851988	0.666377	1.16976
