# Supplementary material for: Phosphorylation of tyrosine 90 in SH3 domain is a new regulatory switch controlling Src kinase
Source: eLife journal article supplement (doi:10.7554/elife.82428), 2023-07-10
Supplement: supp [file Fig 3B source data.xlsx]

## Sheet: List1
PC	90E	90F	527F	WT
1.03609	0.384846	0.660181	0.219712	0.658255
1.03421	0.388508	0.660945	0.218037	0.650168
1.03715	0.400812	0.650749	0.214741	0.650677
0.998852	0.38394	0.649026	0.275348	0.623568
0.99086	0.389353	0.650637	0.273166	0.624664
0.98504	0.391321	0.654321	0.268677	0.618219
0.981904	0.4065	0.656007	0.249636	0.610721
0.972733	0.408474	0.666515	0.257132	0.599211
0.969732	0.413759	0.6603	0.248853	0.615703
1.05416	0.465608	0.749899	0.188798	0.644132
1.05389	0.464098	0.759744	0.188822	0.63312
1.04428	0.463174	0.755798	0.189811	0.627862
0.980465	0.312359	0.630014	0.214082	0.562808
0.964889	0.287977	0.626074	0.221373	0.555089
0.953889	0.289619	0.614678	0.212079	0.557823
1.03724			0.212178	0.616763
1.01601			0.208614	0.613829
1.02677			0.22421	0.618171
			0.157648	0.576404
			0.165925	0.579999
			0.16654	0.567952
			0.33713	0.592275
			0.35112	0.580472
			0.353041	0.584436
