# Supplementary material for: Phosphorylation of tyrosine 90 in SH3 domain is a new regulatory switch controlling Src kinase
Source: eLife journal article supplement (doi:10.7554/elife.82428), 2023-07-10
Supplement: supp [file Fig 3C source data.xlsx]

## Sheet: Source data
Peptid		Imput (pmol)	Intensity
			WT1	WT2	WT3	WT4	WT5	WT6	527F1	527F2	527F3	527F4	527F5	527F6	527F-KD1	527F-KD2	527F-KD3	527F-KD4
AGALAGGVTTFVALYDYESR	light		133678128	243456672	1302497	1021275	792302	180298768	362958656	146784832	272347872	5442483	5471634	87359272	501875296	166840928	285828736	313217440
AGALAGGVTTFVALYDYESR	heavy	0.4	95430488	107003920	1146518	956843	729058	117005576	172713328	297933760	141175552	3156933	3163156	116947960	155737120	191560160	175812656	141288768
AGALAGGVTTFVALY[Phospho (Y)]DYESR	light		3902401	4826302	23499	26252	17929	5452680	31922030	13735463	22806012	638847	685730	8826944	818258	409647	324004	199124
AGALAGGVTTFVALY[Phospho (Y)]DYESR	heavy	0.4	171603344	225219984	2797741	2712574	1828375	288245888	252265136	251635952	253856192	11155666	11908923	203208624	257922944	294408320	294560096	256407312
LIEDNEYTAR	light		283170176	332584448	11542300	11262300	11192998	499139584	257187328	102496040	205234720	10243911	10145928	151012096	748015936	222016448	563299456	558098176
LIEDNEYTAR	heavy	0.4	1477816704	1296606208	144123808	142934784	138916624	2321300224	992983168	919611712	843834048	122252272	125713904	2168955904	1413260544	1511209728	1694165504	1487577728
LIEDNEY[Phospho (Y)]TAR	light		3945894	10842976	842827	1029561	892938	58321824	19350508	5872294	14975080	6606201	6845050	75462016	228043	104521	173683	156412
LIEDNEY[Phospho (Y)]TAR	heavy	0.4	79443776	87604448	61133244	70666864	64154744	429320512	64207732	56345788	56357572	56226440	58257532	474144096	89925840	103022368	117029376	93758344
Ratio phospho to total peptid (%)			WT1	WT2	WT3	WT4	WT5	WT6	527F1	527F2	527F3	527F4	527F5	527F6	527F-KD1	527F-KD2	527F-KD3	527F-KD4
LIEDNEY[Phospho (Y)]TAR	Y416		20.5854	32.548	14.6866	15.605	14.7298	38.7168	53.7804	48.3223	52.2104	59.4026	58.3613	69.5669	0.476835	0.68584	0.44437	0.442693
AGALAGGVTTFVALY[Phospho (Y)]DYESR	Y90		1.59749	0.93307	0.733917	0.898584	0.894254	1.21272	5.67947	9.97416	4.44968	3.21498	3.22154	5.49547	0.0983488	0.159503	0.0676125	0.0350189
