# Supplementary material for: Phosphorylation of tyrosine 90 in SH3 domain is a new regulatory switch controlling Src kinase
Source: eLife journal article supplement (doi:10.7554/elife.82428), 2023-07-10
Supplement: supp [file Fig 4B source data.xlsx]

## Sheet: List1
WT	90E	90F	527F	WT FA	90E FA	90F FA	527F FA
1.34227	0.993628	1.25511	1.01106	0.751883	0.332977	1.14931	0.225565
1.25511	1.04592	1.48173	0.697283	0.794849	0.805589	0.515578	0.1826
0.871604	1.3597	1.18538	0.784444	0.945225	0.515578	0.923742	0.504836
1.15052	1.18538	1.56889	1.01106	0.998931	0.5478	0.580024	0.075189
0.889035	1.04592	1.15052	0.889035	0.644471	0.612247	0.813902	0.214824
0.941332	1.15052	0.801875	1.412	0.945225	0.515578	0.978882	0.204082
0.889035	0.784444	0.889035	1.27254	1.03115	0.549934	1.14386	0.186977
1.20281	0.732148	0.9239	0.836739	1.10634	0.67092	0.736911	0.120985
1.04592	1.18538	0.906468	1.09822	0.549934	0.538935	0.692917	0.109987
1.39457	0.906468	0.906468	1.27254	0.637923	0.758908	0.571931	0.142983
0.854172	1.01106	1.08079	0.906468	0.65992	0.8249	0.967883	0.219973
0.697283	0.836739	0.941332	1.18538	0.945886	0.703915	0.879894	0.120985
1.02849	1.02849	1.20281	1.16795	0.978882	0.714914	0.593929	0.098988
1.27254	0.697283	1.23768	1.32484	0.450946	0.593929	0.989881	0.120985
1.16795	0.749579	1.23768	0.854172	0.637923	0.615926	0.538935	0.087989
1.39457	0.714715	1.62118	0.657894	0.615926	0.65992	0.789286	0.157857
1.08079	1.16795	0.993628	0.756087	0.67092	0.687806	0.5525	0.112755
1.412	1.16795	1.27254	0.756087	0.626924	0.326989	0.5525	0.090204
1.15868	1.05067	1.7955	0.657894	0.703915	0.473571	0.687806	0.078929
1.06049	0.923015	1.11565	0.8641	0.736911	0.529949	0.575051	0.078929
0.873919	0.981932	0.756087	1.08994	0.473571	0.518674	0.5525	0.078929
0.942655	1.20778	0.775725	1.02121	0.428469	0.349541	0.969694	0.169132
1.28633	0.873919	0.932834	1.1194	0.766735	0.45102	0.834388	0.112755
1.30597	1.23723	1.26669	0.815003	0.687806	0.473571	1.04862	0.112755
1.08994	1.1194	0.85428	1.15868	0.924592	0.563775	0.597602	0.078929
1.41398	1.10958	0.756087	0.815003	0.890765	0.473571	0.755459	0.067653
1.19796	1.12922	0.913196	0.687352	0.789286	0.789286	0.631429	0.124031
1.10958	0.942655	0.844461	1.18814	0.800561	0.845663	0.518674	0.078929
1.24705	0.85428	0.932834	0.952474	0.744183	0.338265	0.586326	0.124031
0.932834	0.952474	1.27651	0.815003	0.834388	0.338265	0.687806	0.090204
0.942655	0.942655	1.09976	0.726629	0.575051	0.484847
1.18814	1.29615	0.815003	1.04085	0.586326
0.824822	1.1194	0.70699	0.972112	0.620153
1.1841	1.08994	1.08994	1.19796	0.45102
1.1044	1.01332	1.02121	1.19548	0.789286
1.32073	1.19548	1.09976	0.888075
1.33211	1.21826	0.972112	0.967773
1.29795	0.740063	0.972112	1.29795
1.04747	0.774219	0.932834	1.43458
0.990545	1.05886	1.1044	1.2638
1.09302	1.49151	0.69452	0.888075
0.967773	1.43458	1.09302	1.05886
0.69452	1.12717	0.979159	1.00193
0.842533	1.22964	0.89946	1.51428
0.831147	1.14994	0.910846	1.07024
0.979159	1.20687	1.21826	1.24103
1.33211	1.07024	1.43458	1.11579
1.2638	0.819762	1.20687	1.2638
1.24103	1.09302	1.14994	0.89946
1.0247	0.671749	1.12717	0.79699
1.21826	0.59205	1.43458	0.990545
1.22964	0.90226	0.89946	1.14994
1.2782	0.837813	1.16133	1.28657
0.880778	0.923742	1.20687	1.00193
1.10634	1.31042	1.37765	0.870036
1.23524	1.34265	1.61675	1.00967
1.45006	1.19227	1.1841	0.827072
0.934484	1.07412	1.1841	0.891518
1.16005	0.784107	1.00193	0.784107
0.923742	1.26746	1.4071	0.794849
0.998931	0.934484	1.06338	1.06338
1.00967	0.966707	0.837813	0.859296
0.655213	0.91289	1.07412	1.03115
1.17079	0.91289	0.676695	1.17079
0.945225	1.08887	1.37487	1.06338
1.06338	0.703915	0.870036	0.681918
1.42858	0.934887	0.816331	0.780906
1.43932	1.01188	0.71966	0.769908
1.01188	1.35284	1.38583	0.604927
1.31984	1.18786	1.39683	0.549934
0.890893	1.07787	1.36383	0.802903
1.38583	0.780906	1.22085	0.835899
1.03388	0.769908	1.26485	0.648921
1.17686	0.846897	1.12186	0.989881
1.13286	1.16586	1.15486	0.747909
0.879894	0.980969	1.37483	0.923888
1.6278	1.0148	0.967883	0.692917
0.967883	0.992245	0.901891	0.980969
1.45182	1.0148	0.823112	1.0148
0.967883	0.856939	0.665255	1.03735
0.780906	0.868214	0.845663	0.778011
0.901891	1.33051	1.1501	1.03735
1.04487	1.37561	0.845663	0.924592
0.710357	1.04862	1.00352	0.890765
1.04862	0.947143	0.65398	0.947143
1.09373	1.16138	0.958418	1.00352
1.105	0.958418	1.12755	0.947143
1.105	1.0599	1.09373	0.721632
1.08245		1.54475	0.958418
1.27413			0.800561
0.924592			0.947143
1.22903
1.30796
1.31923
1.1952
1.0599
1.0148
