# Supplementary material for: Phosphorylation of tyrosine 90 in SH3 domain is a new regulatory switch controlling Src kinase
Source: eLife journal article supplement (doi:10.7554/elife.82428), 2023-07-10
Supplement: supp [file Fig 5B source data.xlsx]

## Sheet: List1
MSCV	Src90E	Src90F	Src527F	c-Src
0	46.01	0	92.0201	0
0	43.3405	1.88437	92.8052	4.71092
0	41.1669	0	96.8632	4.84316
0	19.7186	0	118.311	13.1457
