# Supplementary material for: Phosphorylation of tyrosine 90 in SH3 domain is a new regulatory switch controlling Src kinase
Source: eLife journal article supplement (doi:10.7554/elife.82428), 2023-07-10
Supplement: supp [file Fig 5C source data.xlsx]

## Sheet: List1
MSCV	Src90E	Src90F	Src527F	c-Src
0.1923	0.2619	0.2421	0.265433	0.21925
0.129275	0.2517	0.22485	0.207575	0.215058
0.182892	0.276442	0.220234	0.269367	0.241634
0.2179	0.300725	0.279475	0.2999	0.237125
