# Supplementary material for: Phosphorylation of tyrosine 90 in SH3 domain is a new regulatory switch controlling Src kinase
Source: eLife journal article supplement (doi:10.7554/elife.82428), 2023-07-10
Supplement: supp [file Fig 5D source data.xlsx]

## Sheet: Akt pS473
Akt pS473
MSCV	Src90E	Src90F	Src527F	c-Src
4.36589	26.4572	9.5629	27.3486	12.6418
9.70181	24.8439	14.6729	22.7834	13.0925
6.10086	17.0315	10.2299	28.06	17.121
5.87053	27.434	16.2272	33.17	8.95225
4.74232	17.3778	5.17495	35.9046	19.1038
1.76287	24.0496	1.5202	36.9289	11.168

## Sheet: pErk
pErk
MSCV	Src90E	Src90F	Src527F	c-Src
14.8638	33.9214	4.08592	31.027	5.44884
14.7817	26.6014	6.90477	15.8538	12.599
23.5723	23.9137	10.5811	20.9504	11.5154
13.1932	20.8677	9.4637	36.3016	10.2713
8.72885	27.7606	7.86634	32.5637	15.9244
17.2184	25.154	8.47857	17.7479	14.3732
16.01	25.3902	11.2944	16.6197	19.446

## Sheet: Stat3 pY705
Stat3 pY705
MSCV	Src90E	Src90F	Src527F	c-Src
11.0914	21.9976	2.29312	31.4893	12.8138
1.3262	39.9626	11.5483	33.6152	8.05326
13.7649	19.9735	1.39872	49.2824	8.95853
8.04861	15.4807	7.95126	47.6984	9.36813
9.08902	19.1361	8.2124	44.3198	10.8613
19.8563	33.9682	5.05087	34.6153	3.38433
14.5969	30.3839	5.63204	43.1951	3.37177
18.0575	36.844	1.5254	42.6908	0.185372
6.33654	32.1771	1.12538	56.4582	1.34981
