# Supplementary material for: Phosphorylation of tyrosine 90 in SH3 domain is a new regulatory switch controlling Src kinase
Source: eLife journal article supplement (doi:10.7554/elife.82428), 2023-07-10
Supplement: supp [file Fig 6A source data.xlsx]

## Sheet: List1
MSCV	Src90E	Src90F	Src527F	c-Src
0.27957	4.31056	0.614035	5.75676	3.00188
0	3.20055	0.950495	6.60862	1.05556
0.586011	3.46369	1.99525	4.68917	0.440613
0.023041	3.09958	1.16129	5.59122	0.628684
0.097656	3.02083	0.868762	8.51528	0.78056
0	2.26721	1.82927	6.13303	0.914729
0.308989	2.04802	1.35397	8.39882	1.70663
0.655738	2.62724	1.15658	8.19379	1.19534
0	2.95352	0.273312	10.819	0.325407
0.035587	3.91433	0.616302	5.68102	0.466667
0.064725	2.78308	0.371094	10.1404	1.45722
0		0.801964	10.4644	0.511628
0.323974		0.212389	11.2829	0.606827
0.338983		0.381282	9.28274	0.710956
0.021739
0
0.071813
0.086022
