# Supplementary material for: Phosphorylation of tyrosine 90 in SH3 domain is a new regulatory switch controlling Src kinase
Source: eLife journal article supplement (doi:10.7554/elife.82428), 2023-07-10
Supplement: supp [file Fig 6B source data.xlsx]

## Sheet: List1
MSCV	Src90E	Src90F	Src527F	c-Src
1.28152	11.5675	4.96194	18.7665	5.94605
1.29018	9.106	4.96651	18.0782	6.40137
1.35785	12.1318	5.16686	20.7385	4.99008
1.36922	12.078	6.10044	19.1156	7.6452
1.28098	14.8259	3.13459	18.5931	8.20453
1.91218	13.572	6.32778	20.3547	8.46793
1.46229	15.4907	5.10404	26.4906	7.7445
1.51588	10.4086	6.67209	22.6228	7.62308
1.83682	11.6659	5.33037	14.7831	9.14408
2.05112	7.65675	9.92348	15.9458	8.5977
2.33298	7.29931	8.6456	13.7245	6.2948
2.17235	10.3974	9.90431	15.2632	5.81018
2.31121	10.1864	9.77172	27.6451	6.22703
2.02644	9.78623	8.90844	28.3928	8.78258
1.21328	11.5486	7.00138	18.806	3.81848
1.31083	11.0441	8.08938	24.6839	8.48348
1.40031	11.9979	7.73363	18.2354	7.87431
1.33274	13.9799	6.83477	20.499	8.01272
1.47954	7.1646	4.667	14.0011	3.42115
1.11982	10.6265	4.34438		3.9392
1.62079	11.4914	7.28789		5.79192
1.05963	11.1163	4.11296		8.841
1.2085	8.08862	6.20383		6.44599
1.55502	14.8146	7.61492		7.49029
1.18838	10.5073	3.87933		4.69179
0.989286	13.2483	4.53952		6.62927
1.10448	7.08727	4.6707
1.49618	7.37513	5.0154
1.08119	11.5746	3.83069
1.30089		4.22458
1.75526		3.97716
1.46792		5.15118
1.46688		5.97322
1.06736
1.12655
1.04691
1.07671
1.82638
