# Supplementary material for: Phosphorylation of tyrosine 90 in SH3 domain is a new regulatory switch controlling Src kinase
Source: eLife journal article supplement (doi:10.7554/elife.82428), 2023-07-10
Supplement: supp [file Fig 6D source data.xlsx]

## Sheet: FAK pY397
FAK pY397
MSCV	Src90E	Src90F	Src527F	c-Src
30.6901	14.6796	8.13074	26.2259	13.3915
26.2323	11.0507	6.4476	33.9865	9.7858
20.9611	10.4675	14.9881	28.7202	14.5762
31.2165	13.7663	11.4571	25.0186	8.33028
24.0087	10.235	11.3306	29.9726	13.9495

## Sheet: FAK pY861
FAK pY861
MSCV	Src90E	Src90F	Src527F	c-Src
0.647689	4.84842	4.97178	51.3984	14.8435
0	5.72889	2.80937	33.8366	23.7087
0	3.80654	9.42989	51.5927	15.1956
0	1.82113	9.96201	41.0555	18.7586
0	14.0951	4.11944	31.8655	10.4689
0	4.7006	0.462851	60.3731	21.2165

## Sheet: Cas pY410
Cas pY410
MSCV	Src90E	Src90F	Src527F	c-Src
0	9.98259	10.1267	48.5345	12.2912
0	24.2937	0	41.1646	12.5771
0	29.9429	3.2097	53.0648	8.10416
0	12.1042	4.82205	57.8011	14.0063

## Sheet: paxillin pY118
paxillin pY118
MSCV	Src90E	Src90F	Src527F	c-Src
0	19.5181	5.80076	42.8974	10.8092
0	25.3218	11.7494	40.9725	12.1856
0	19.1752	8.1511	47.8182	9.62599
0	23.577	12.401	34.9046	12.9747
0	15.1709	4.69967	50.0013	15.8446
0	24.5086	0	39.8782	13.1627
0	10.9443	6.85301	42.8841	10.4946
