# Supplementary material for: Phosphorylation of tyrosine 90 in SH3 domain is a new regulatory switch controlling Src kinase
Source: eLife journal article supplement (doi:10.7554/elife.82428), 2023-07-10
Supplement: supp [file Fig 7B source data.xlsx]

## Sheet: List1
Src527F	Src527F90E	Src527F90F
0.008353	0.009564	0.008689
0.011069	0.012398	0.009791
0.009104	0.0139	0.01041
0.011161	0.011	0.008719
0.012986	0.014928	0.00881
0.010742	0.011439	0.011109
0.008049	0.011734	0.00503
