# Supplementary material for: Phosphorylation of tyrosine 90 in SH3 domain is a new regulatory switch controlling Src kinase
Source: eLife journal article supplement (doi:10.7554/elife.82428), 2023-07-10
Supplement: supp [file Fig 7D source data.xlsx]

## Sheet: List1
527F	527F90E	527F90F
0.219712	0.298392	0.408343
0.218037	0.313269	0.405855
0.214741	0.320443	0.409879
0.275348	0.196153	0.282956
0.273166	0.199195	0.288922
0.268677	0.190906	0.295399
0.249636	0.222375	0.375431
0.257132	0.231799	0.374162
0.248853	0.220519	0.381857
0.188798	0.195978	0.322026
0.188822	0.185806	0.323655
0.189811	0.201252	0.311439
0.214082
0.221373
0.212079
0.212178
0.208614
0.22421
0.157648
0.165925
0.16654
0.33713
0.35112
0.353041
