# Supplementary material for: Phosphorylation of tyrosine 90 in SH3 domain is a new regulatory switch controlling Src kinase
Source: eLife journal article supplement (doi:10.7554/elife.82428), 2023-07-10
Supplement: supp [file Fig 7F source data.xlsx]

## Sheet: List1
Src527F	Src527F90E	Src527F90F
105.704	142.69	98.7601
106.298	141.968	86.0509
87.9977	135.404	87.4477
	130.897
