# Supplementary material for: Phosphorylation of tyrosine 90 in SH3 domain is a new regulatory switch controlling Src kinase
Source: eLife journal article supplement (doi:10.7554/elife.82428), 2023-07-10
Supplement: supp [file Fig 7H source data.xlsx]

## Sheet: List1
Src527F	Src527F90E	Src527F90F
26.515	37.5831	19.9674
22.6793	30.5775	19.7244
25.3328	35.1055	21.3357
26.9781	39.4006	18.4901
22.2508	32.8318	21.3465
25.3516	29.2899	19.274
26.2118	35.1339	18.6337
22.5145	35.5845	17.793
22.4419	31.8461	18.5418
22.2549	25.9063	22.2199
22.0346	33.0952	15.1201
24.4885	28.9221	16.3637
23.0719	37.3608	15.7591
26.223	35.1695	17.3662
22.8224	34.5134	19.6406
22.4878	32.1398	16.3895
24.9222	33.5432	19.3275
24.8557	32.7894	16.7175
22.3233	30.5691	15.8249
24.2538	32.4628	20.5021
22.4052	32.7442	18.3751
27.9627	33.9204	18.0689
24.7093	31.7015	17.0193
23.3291	31.9357	15.8669
26.6261	29.628	21.46
21.9212	37.2977	19.0721
20.63	32.6636	13.7484
24.2302	33.0279	21.4767
	32.7187	20.365
	31.6096	19.6445
	29.4766	17.646
	30.1609	13.6565
		14.2657
		15.3004
		19.0654
