# Supplementary figures and images for: Phosphorylation of tyrosine 90 in SH3 domain is a new regulatory switch controlling Src kinase
Source: eLife journal article supplement (doi:10.7554/elife.82428), 2023-07-10

Figure 1A

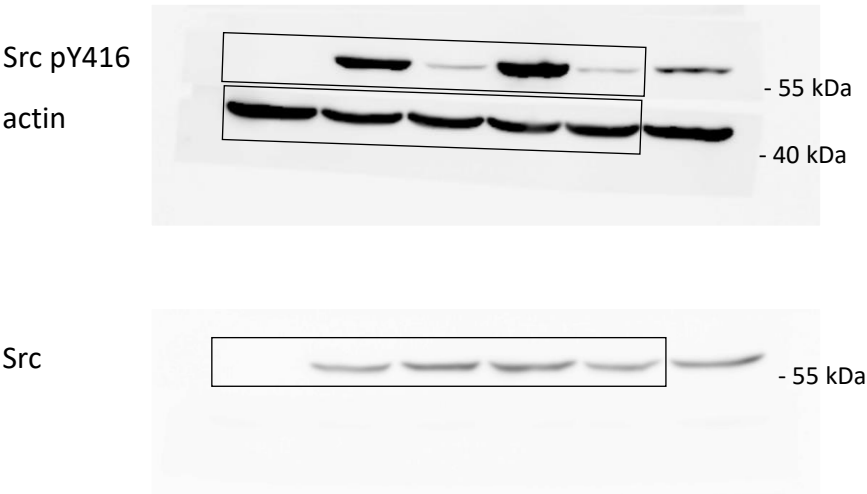

Supplement: fig1-data1 [file elife-82428-fig1-data1-v2.zip]

Figure 5D

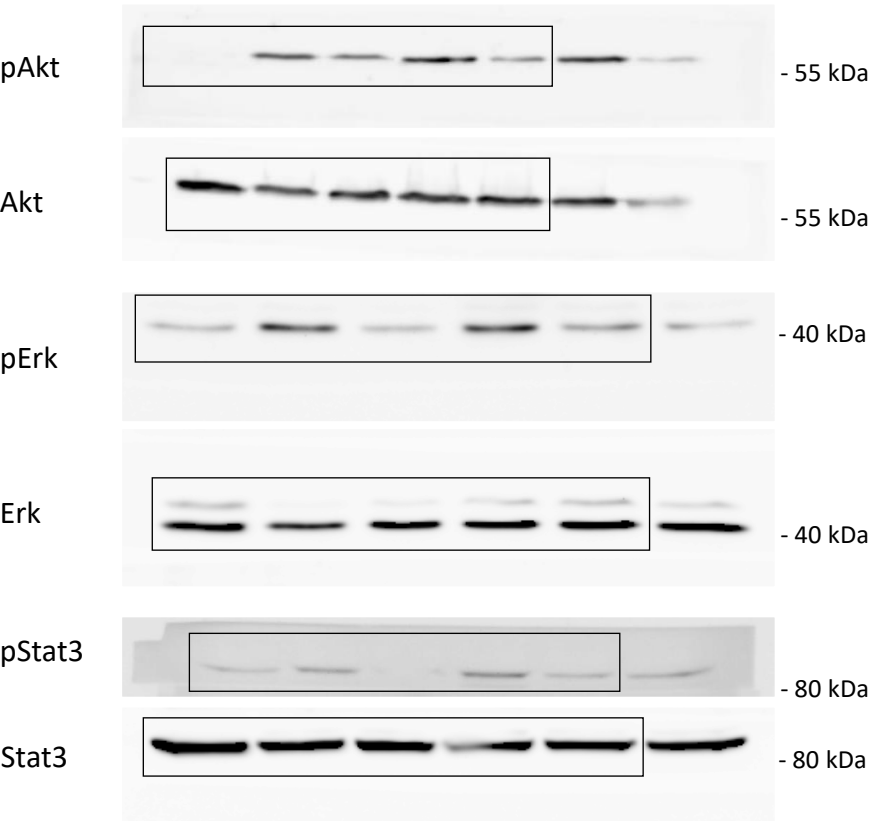

Supplement: fig5-data1 [file elife-82428-fig5-data1-v2.zip]

**Figure 6D**

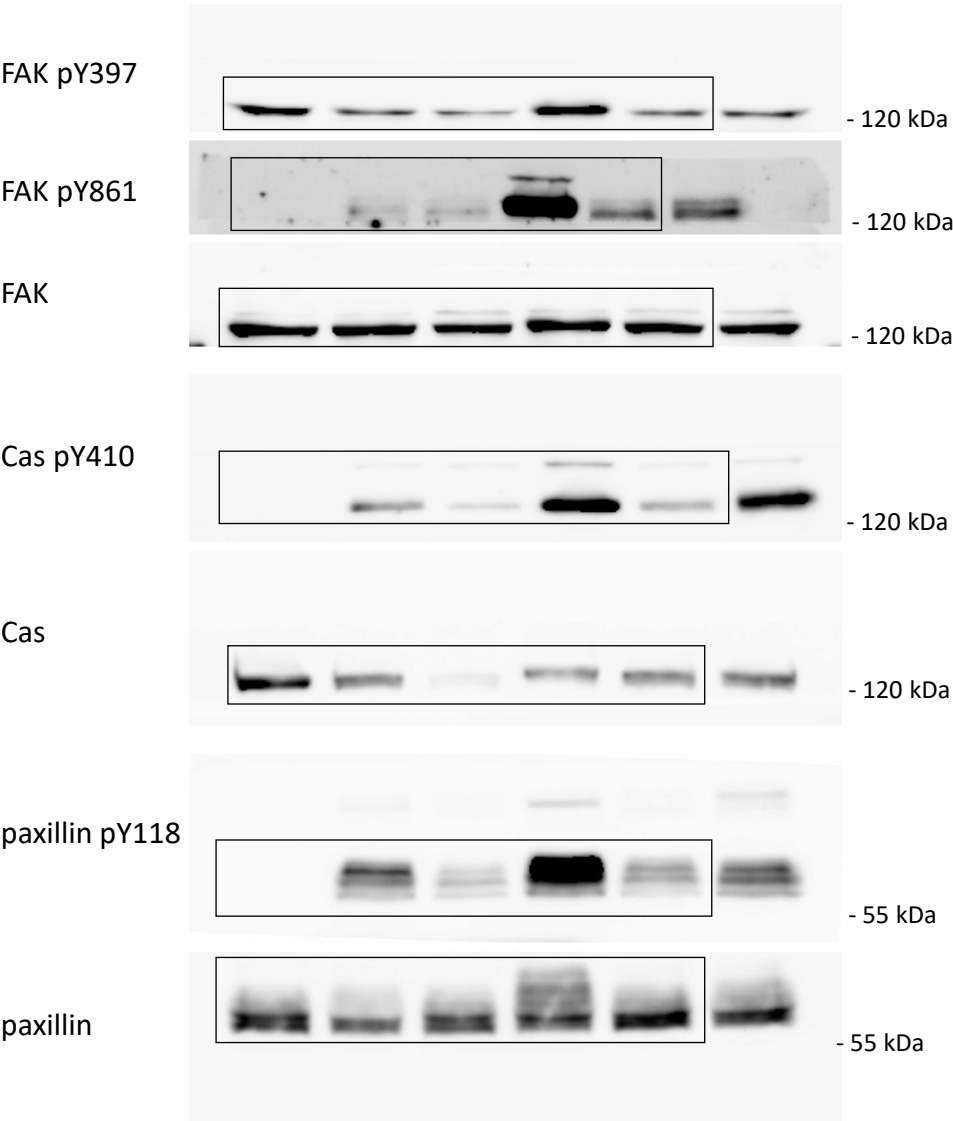

Supplement: fig6-data1 [file elife-82428-fig6-data1-v2.zip]

Figure 5D

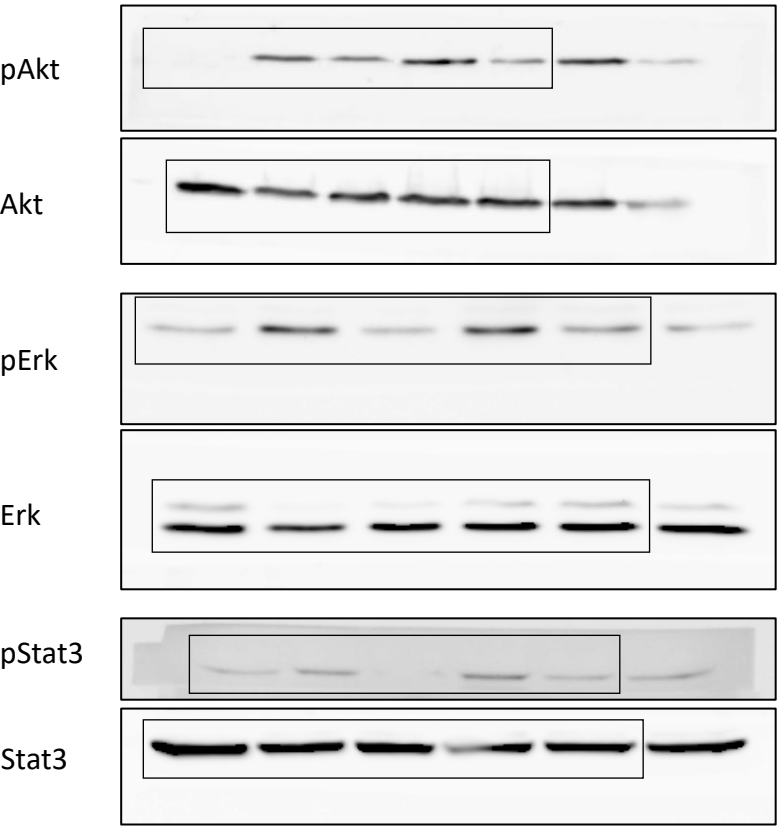

Supplement: supp [file elife-82428-supp-v1.zip]

Figure 7 – figure supplement 1

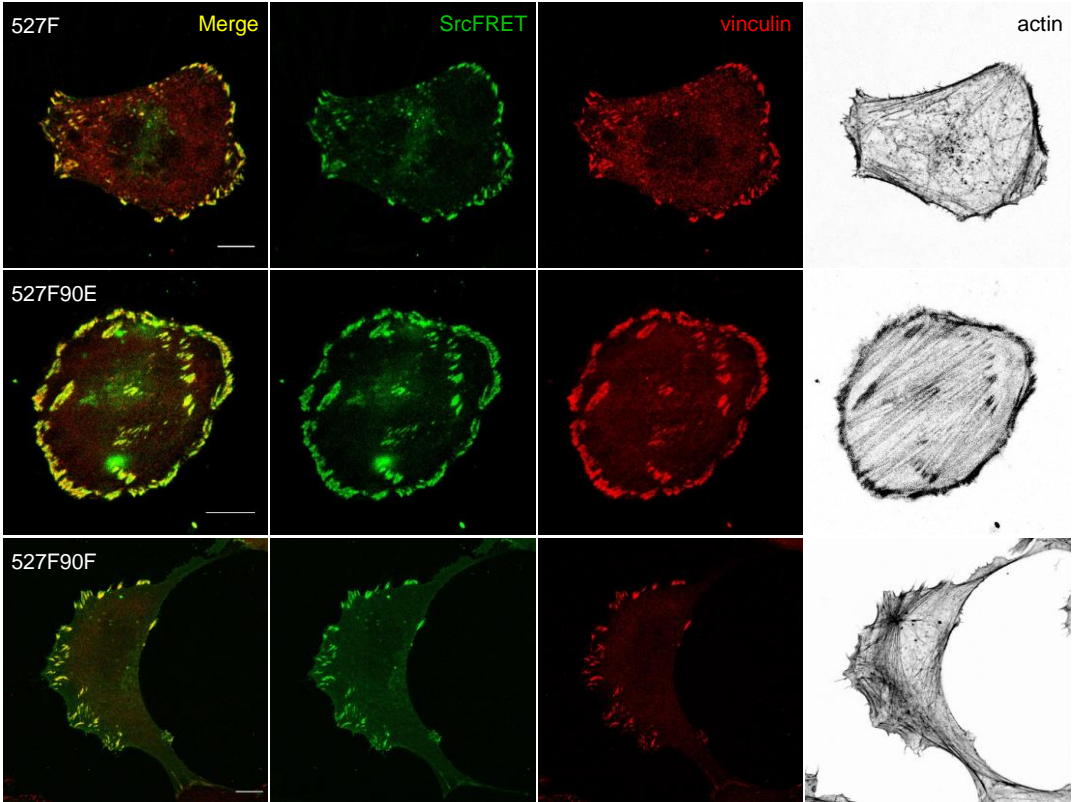

Supplement: supp [file elife-82428-supp-v1.zip]

Figure 6D

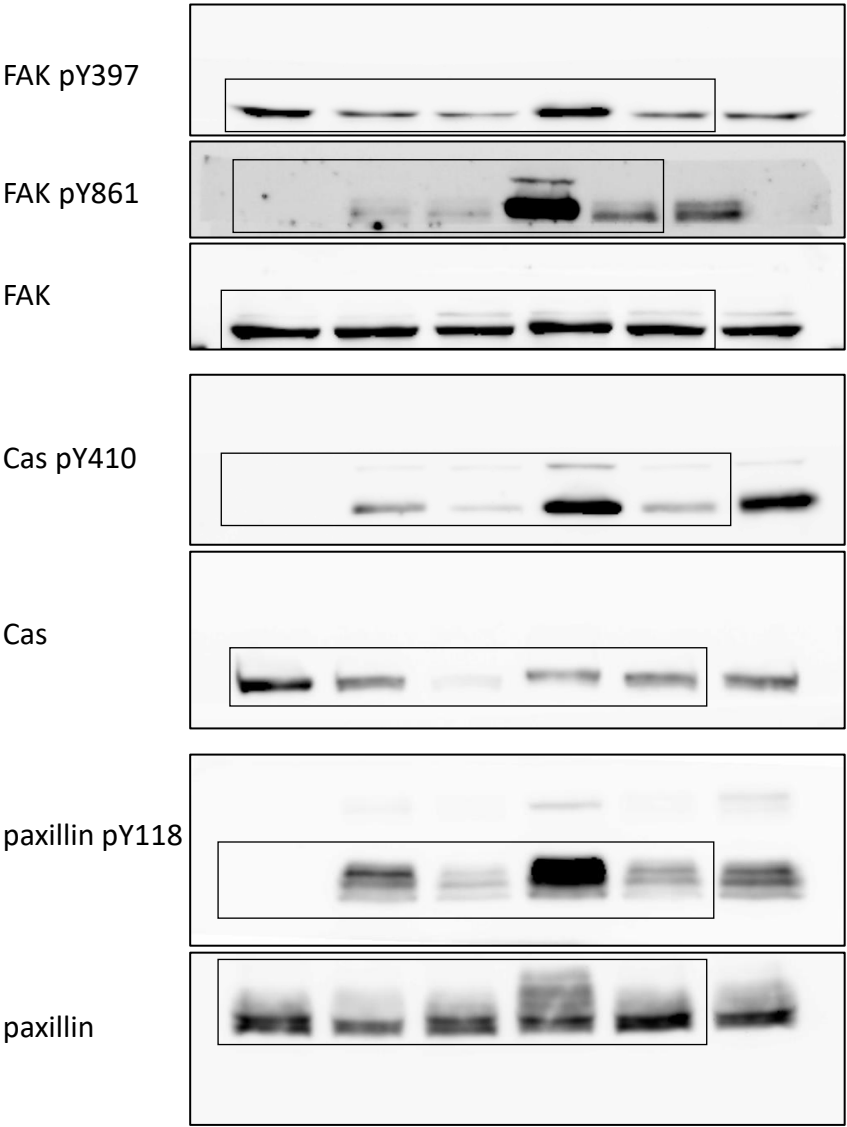

Supplement: supp [file elife-82428-supp-v1.zip]

Figure 4 – figure supplement 1

A

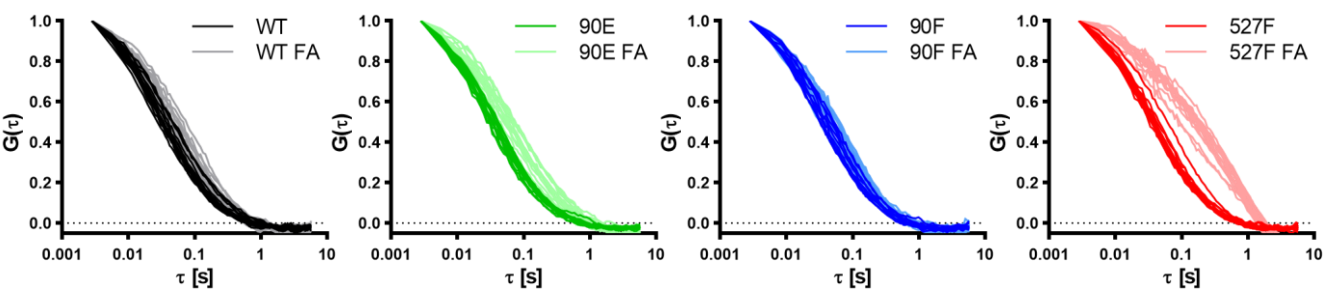

B

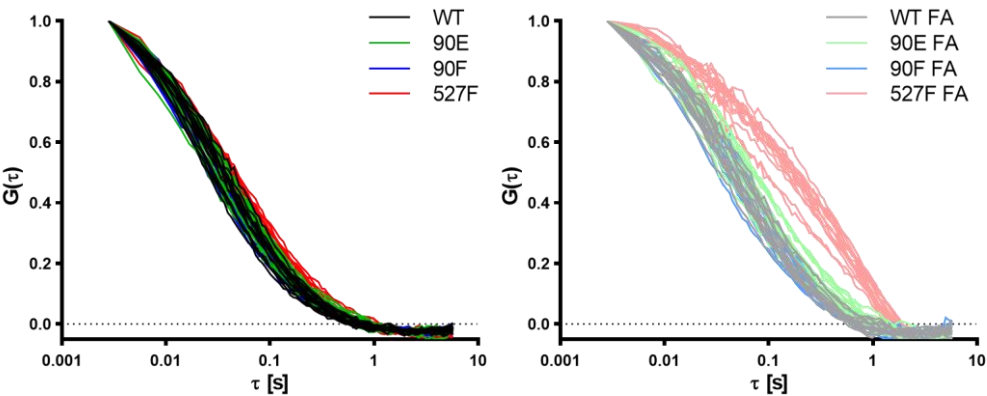

C

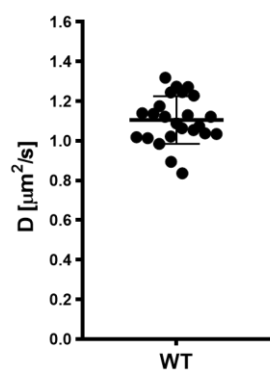

Supplement: supp [file elife-82428-supp-v1.zip]

Figure 1A

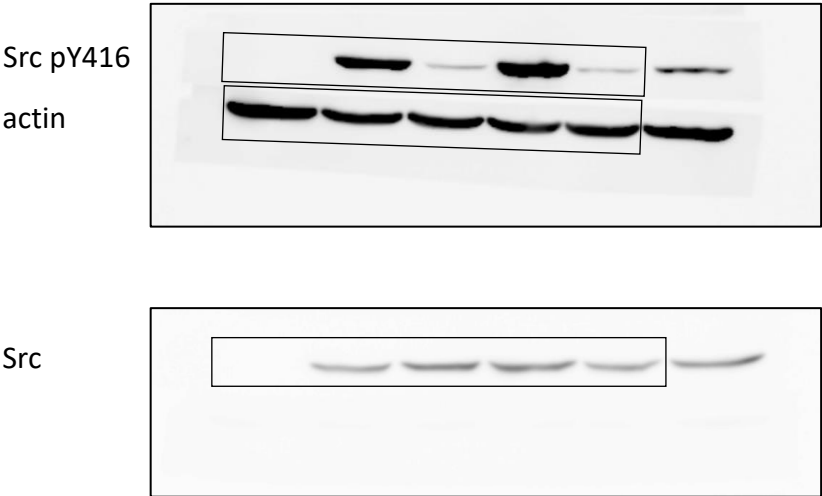

Supplement: supp [file elife-82428-supp-v1.zip]

Figure 3 – figure supplement 1

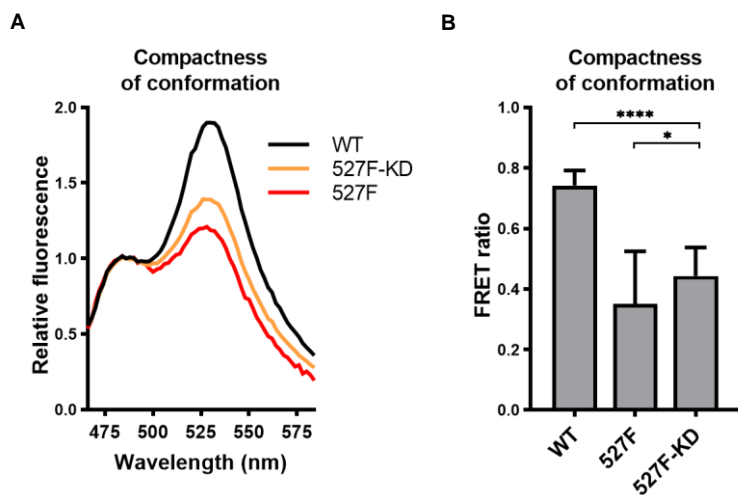

Supplement: supp [file elife-82428-supp-v1.zip]
